# Supplementary material for: Consumption in Ottoman Manastir (Bitola) and Manisa: a long term perspective
Source: MDPI journal article supplement (doi:10.3390/diagnostics12020476), 2011-01-01
Supplement: s1 [file s1]

**Table S1.** Databases and search strategies used in present systematic review

| Table S1. Databases and search strategies used in present systematic review |                 |                                                                                                                                   |         |
|-----------------------------------------------------------------------------|-----------------|-----------------------------------------------------------------------------------------------------------------------------------|---------|
| Database                                                                    | Coverage        | Search run                                                                                                                        | Records |
| MEDLINE                                                                     | 1946 to present | ferritin AND myocardial infarction                                                                                                | 20      |
|                                                                             |                 | ferritin AND acute coronary syndrome                                                                                              | 3       |
|                                                                             |                 | ferritin AND myocardial infarction AND (adverse outcomes OR mortality)                                                            | 11      |
|                                                                             |                 | (ferritin OR iron deficiency) AND (myocardial infarction OR acute coronary syndrome OR percutaneous coronary intervention OR PCI) | 294     |
|                                                                             |                 | Total records = 328                                                                                                               |         |
| Embase                                                                      | 1966 to present | ferritin AND myocardial infarction                                                                                                | 74      |
|                                                                             |                 | ferritin AND acute coronary syndrome                                                                                              | 111     |
|                                                                             |                 | ferritin AND myocardial infarction AND (adverse outcomes OR mortality)                                                            | 18      |
|                                                                             |                 | (ferritin OR iron deficiency) AND (myocardial infarction OR acute coronary syndrome OR percutaneous coronary intervention OR PCI) | 126     |
|                                                                             |                 | Total records = 329                                                                                                               |         |
| Cochrane library                                                            | 1967 to present | ferritin AND myocardial infarction                                                                                                | 54      |
|                                                                             |                 | ferritin AND acute coronary syndrome                                                                                              | 18      |
|                                                                             |                 | ferritin AND myocardial infarction AND (adverse outcomes OR mortality)                                                            | 32      |
|                                                                             |                 | (ferritin OR iron deficiency) AND (myocardial infarction OR acute coronary syndrome OR percutaneous coronary intervention OR PCI) | 88      |
|                                                                             |                 | Total records = 192                                                                                                               |         |
| ALL RECORDS = 849                                                           |                 |                                                                                                                                   |         |
