# Supplementary material for: Consumption in Ottoman Manastir (Bitola) and Manisa: a long term perspective
Source: MDPI journal article supplement (doi:10.3390/diagnostics12020476), 2011-01-01
Supplement: s1 [file s1]

**Table S2.** Quality assessment of included studies using Newcastle-Ottawa scale.

| Study       | Case definition | Case representativeness | Selection of controls | Definition of controls | Comparability | Exposure ascertainment | Ascertainment methods | Non-response rate | Total |
|-------------|-----------------|-------------------------|-----------------------|------------------------|---------------|------------------------|-----------------------|-------------------|-------|
| Feng, 2018  | *               | *                       | *                     | *                      | *             | *                      | *                     |                   | 7     |
| Basu, 2014  | *               | *                       | *                     | *                      | *             | *                      | *                     |                   | 7     |
| Singh, 2021 | *               | *                       | *                     | *                      | *             | *                      |                       |                   | 6     |

NA = not applicable.

Good quality: 3 or 4 stars in selection domain AND 1 or 2 stars in comparability domain AND 2 or 3 stars in outcome/exposure domain. Fair quality: 2 stars in selection domain AND 1 or 2 stars in comparability domain AND 2 or 3 stars in outcome/exposure domain. Poor quality: 0 or 1 star in selection domain OR 0 stars in comparability domain OR 0 or 1 stars in outcome/exposure domain.
